# Supplementary material
Source: PubMed Central journal article supplement (PMC3595354)
Supplement: NIHMS424242-supplement-supplement_1.pdf [file NIHMS424242-supplement-supplement_1.pdf]

**Table S1.** A list of genes related to pathogen recognition\*

| Gene name                            | Domain(s)                               | Contig(s)                              | nCF    | nCH    | nIF    | nIH    | nIF:nCF | nIH:nC |
|--------------------------------------|-----------------------------------------|----------------------------------------|--------|--------|--------|--------|---------|--------|
| <u><i>CTL10</i></u>                  | Lectin-C                                | 11458, 14515, 14516, 15639, 17942      | 675.4  | 0.0    | 1788.3 | 0.0    | 2.7     | 0/0    |
| <i>Draper</i>                        | EMI, NIM repeats                        | 1849, 10216                            | 0.0    | 83.5   | 18.1   | 142.9  | 1.5     | 1.7    |
| <i>Dscam</i>                         | FN-3, Ig                                | 5244, 7892, 9670                       | 0.0    | 19.6   | 24.2   | 35.0   | 2.0     | 1.8    |
| <i>Galectin-2</i>                    | $\beta$ -propeller repeats              | 7714                                   | 0.0    | 12.3   | 0.0    | 8.7    | 0/0     | 0.7    |
| <i>Galectin-4</i>                    | GLECT                                   | 2140                                   | 11.8   | 51.6   | 24.2   | 20.4   | 2.0     | 0.4    |
| <u><i>Hemicentin 1</i></u>           | Ig                                      | 131, 465, 14278                        | 1729.9 | 186.7  | 2319.9 | 699.9  | 1.3     | 3.8    |
| <u><i>Hemicentin 2</i></u>           | Ig                                      | 4353                                   | 47.4   | 267.7  | 163.1  | 1545.6 | 3.4     | 5.8    |
| <u><i>Hemolin</i></u>                | Ig                                      | 3442                                   | 11.8   | 29.5   | 8868.8 | 116.6  | 748.5   | 4.0    |
| <u><i>IML-2</i></u>                  |                                         | 4775                                   | 11.8   | 0.0    | 537.7  | 0.0    | 45.4    | 0/0    |
| <u><i>IML-3</i></u>                  | Lectin-C                                | 1097, 13163, 14125                     | 1670.6 | 800.7  | 2688.4 | 673.6  | 1.6     | 0.8    |
| <i>IML-3a</i>                        | Lectin-C                                | 13452, 16454                           | 94.8   | 1078.2 | 0.0    | 985.7  | 0.0     | 0.9    |
| <i>IML-3b</i>                        | Lectin-C                                | 6630, 7642, 13397, 18062               | 165.9  | 2149.0 | 350.4  | 860.3  | 2.1     | 0.4    |
| <u><i>IML-4</i></u>                  |                                         | 4808                                   | 0.0    | 0.0    | 2573.6 | 5.8    | 217.2   | 2.4    |
| <u><i>Lectin</i></u>                 |                                         | 6497                                   | 651.7  | 8397.2 | 30.2   | 3893.1 | 0.0     | 0.5    |
| <u><i>Lectin prec.</i></u>           | VWD                                     | 14570                                  | 545.0  | 4990.7 | 6.0    | 2143.4 | 0.0     | 0.4    |
| <u><i>Leureptin</i></u>              | LRR                                     | 4012, 8453, 15857                      | 1978.7 | 9.8    | 4392.1 | 58.3   | 2.2     | 5.9    |
| <i>Leureptin2</i>                    | LRR                                     | 2194                                   | 177.7  | 4.9    | 126.9  | 0.0    | 0.7     | 0.0    |
| <i>NimA</i>                          | NIM repeats                             | 858                                    | 35.5   | 152.3  | 0.0    | 265.4  | 0.0     | 1.7    |
| <i>NimB</i>                          |                                         | 8820                                   | 11.8   | 90.9   | 18.1   | 81.7   | 1.5     | 0.9    |
| <u><i>PGRP-1</i></u>                 |                                         | 13190, 14104                           | 343.6  | 0.0    | 1752.0 | 64.2   | 5.1     | 26.1   |
| <u><i>PGRP-2</i></u>                 |                                         | 14700                                  | 0.0    | 0.0    | 1105.6 | 5.8    | 93.3    | 2.4    |
| <u><i>PGRP-3</i></u>                 | Amidase 2                               | 14752                                  | 0.0    | 0.0    | 712.9  | 5.8    | 60.2    | 2.4    |
| <u><i>PGRP-D</i></u>                 | Amidase 2                               | 575                                    | 35.5   | 0.0    | 1564.7 | 14.6   | 44.0    | 5.9    |
| <i>PGRP-L2</i>                       | Amidase 2                               | 151                                    | 47.4   | 147.4  | 24.2   | 195.4  | 0.5     | 1.3    |
| <i>PGRP-L5</i>                       | Amidase 2                               | 309                                    | 201.4  | 265.3  | 175.2  | 268.3  | 0.9     | 1.0    |
| <i>PGRP-LC</i>                       | Amidase 2                               | 3259                                   | 0.0    | 39.3   | 0.0    | 23.3   | 0/0     | 0.6    |
| <u><i>PGRP-S1</i></u>                | Amidase 2                               | 11845                                  | 0.0    | 4.9    | 54.4   | 49.6   | 4.6     | 10.1   |
| <i>PGRP-S2</i>                       | Amidase 2                               | 5684                                   | 0.0    | 2.5    | 96.7   | 11.7   | 8.2     | 4.8    |
| <u><i>PGRP-S5</i></u>                | Amidase 2                               | 8467                                   | 0.0    | 0.0    | 682.7  | 0.0    | 57.6    | 0/0    |
| <u><i>SR-C-like</i></u>              | Somatome-din-B, Sushi (SCR repeat), MAM | 5933, 8686, 13271, 15116, 15350, 15564 | 462.1  | 4573.1 | 48.3   | 4068.1 | 0.1     | 0.9    |
| <i>TEP1</i>                          | $\alpha$ 2M                             | 9741, 10503, 12298                     | 0.0    | 9.8    | 0.0    | 23.3   | 0/0     | 2.4    |
| <i>TEP2</i>                          | $\alpha$ 2M                             | 8026, 8870                             | 23.7   | 29.5   | 6.0    | 37.9   | 0.3     | 1.3    |
| <u><i><math>\beta</math>GRP1</i></u> | GH16- $\beta$ GRP                       | 2979                                   | 580.6  | 0.0    | 555.8  | 11.7   | 1.0     | 4.8    |
| <u><i><math>\beta</math>GRP2</i></u> | GH16- $\beta$ GRP                       | 1326                                   | 11.8   | 22.1   | 114.8  | 204.1  | 9.7     | 9.2    |
| <i><math>\beta</math>GRP3</i>        |                                         | 14744, 14786                           | 308.1  | 0.0    | 296.0  | 0.0    | 1.0     | 0/0    |
| <i><math>\beta</math>GRP4</i>        | GH16- $\beta$ GRP                       | 4114                                   | 213.3  | 4.9    | 271.9  | 17.5   | 1.3     | 3.6    |
| <u><i>MBP</i></u>                    |                                         | 8247                                   | 319.9  | 4.9    | 737.1  | 52.5   | 2.3     | 10.7   |

\* Genes reported by Zhang et al. (2011) are *underlined*. nCF, nCH, nIF and nIH are normalized read numbers and, for genes with two or more contigs, they represent the total values. When nCF = 0, adjusted NRN for nIF (*italics*) is calculated as  $nIF \times 825/9775$ ; when nCH = 0, adjusted NRN for nIH (*italics*) is calculated as  $nIH \times 3980/9775$ .

**Table S2.** Hemolymph proteinases, serpins, and other extracellular signaling molecules (see footnote of Table S1)

| Gene name              | Domain(s)       | Contig(s)                                                                   | nCF    | nCH    | nIF     | nIH    | nIF:nCF | nIH:nCH |
|------------------------|-----------------|-----------------------------------------------------------------------------|--------|--------|---------|--------|---------|---------|
| <i>HP1</i>             | Trypsin         | 8524, 12527, 16264, 16288,<br>16719, 17102, 18182                           | 876.8  | 8709.1 | 42.3    | 5849.8 | 0.1     | 0.7     |
| <i>HP2</i>             | Trypsin         | 6333                                                                        | 35.5   | 24.6   | 18.1    | 40.8   | 0.5     | 1.7     |
| <i>HP3</i>             | Trypsin         | 5756                                                                        | 0.0    | 137.5  | 0.0     | 72.9   | 0/0     | 0.5     |
| <i>HP4</i>             | Trypsin         | 5654                                                                        | 23.7   | 167.0  | 6.0     | 134.1  | 0.3     | 0.8     |
| <i>HP5</i>             | CLIP, trypsin   | 2203                                                                        | 0.0    | 36.8   | 30.2    | 212.9  | 2.6     | 5.8     |
| <i>HP6</i>             | Trypsin         | 540                                                                         | 284.4  | 260.3  | 447.1   | 405.3  | 1.6     | 1.6     |
| <i>HP7</i>             | Trypsin         | 3018, 3762                                                                  | 11.8   | 159.6  | 175.2   | 256.6  | 14.8    | 1.6     |
| <i>HP8</i>             | CLIP, trypsin   | 5370, 9086                                                                  | 379.2  | 4.9    | 712.9   | 29.2   | 1.9     | 5.9     |
| <i>HP9</i>             | Trypsin         | 3989                                                                        | 0.0    | 2.5    | 48.3    | 70.0   | 4.1     | 28.5    |
| <i>HP12</i>            | Trypsin         | 11373                                                                       | 23.7   | 2.5    | 30.2    | 0.0    | 1.3     | 0.0     |
| <i>HP13</i>            | Trypsin         | 1094                                                                        | 35.5   | 191.6  | 12.1    | 189.6  | 0.3     | 1.0     |
| <i>HP14</i>            | LDLa, CCP,      | 3606, 3785                                                                  | 154.0  | 14.7   | 447.1   | 29.2   | 2.9     | 2.0     |
| <i>HP15</i>            | Trypsin         | 4433                                                                        | 0.0    | 4.9    | 18.1    | 32.1   | 1.5     | 6.5     |
| <i>HP17s</i>           | Trypsin         | 5186, 14177                                                                 | 0.0    | 0.0    | 78.5    | 55.4   | 6.6     | 22.6    |
| <i>HP18</i>            | Trypsin         | 8231                                                                        | 0.0    | 2.5    | 0.0     | 99.1   | 0/0     | 40.4    |
| <i>HP19</i>            | Trypsin         | 3199, 6539, 14093                                                           | 35.5   | 39.3   | 235.6   | 81.7   | 6.6     | 2.1     |
| <i>HP20</i>            | Trypsin         | 4242                                                                        | 59.2   | 0.0    | 259.8   | 2.9    | 4.4     | 1.2     |
| <i>HP21</i>            | CLIP, trypsin   | 2439                                                                        | 319.9  | 12.3   | 247.7   | 37.9   | 0.8     | 3.1     |
| <i>HP22</i>            | Trypsin         | 2361                                                                        | 82.9   | 9.8    | 422.9   | 2.9    | 5.1     | 0.3     |
| <i>SPH-1a</i>          | Trypsin         | 6149, 14393                                                                 | 272.5  | 63.9   | 4941.9  | 125.4  | 18.1    | 2.0     |
| <i>SPH-1b</i>          | Trypsin         | 2813                                                                        | 1279.6 | 22.1   | 1891.0  | 210.0  | 1.5     | 9.5     |
| <i>SPH2</i>            | Trypsin         | 2843                                                                        | 876.8  | 19.6   | 809.6   | 8.7    | 0.9     | 0.5     |
| <i>SPH4</i>            | Trypsin         | 2985                                                                        | 35.5   | 0.0    | 954.5   | 0.0    | 26.9    | 0/0     |
| <i>Serpin1</i>         | Serpin          | 7639                                                                        | 7713.4 | 0.0    | 7473.2  | 40.8   | 1.0     | 16.6    |
| <i>Serpin2</i>         | Serpin          | 5255, 5821, 14248, 14456, 15111, 15910<br>16917, 17048, 17058, 17751, 18441 | 106.6  | 790.8  | 302.1   | 9827.5 | 2.8     | 12.4    |
| <i>Serpin3</i>         | Serpin          | 2693                                                                        | 248.8  | 17.2   | 1872.8  | 55.4   | 7.5     | 3.2     |
| <i>Serpin4</i>         | Serpin          | 4422                                                                        | 556.9  | 334.0  | 2235.3  | 615.3  | 4.0     | 1.8     |
| <i>Serpin5</i>         |                 | 5831, 13453, 13454                                                          | 94.8   | 31.9   | 1039.1  | 122.5  | 11.0    | 3.8     |
| <i>Serpin6</i>         | Serpin          | 1706                                                                        | 82.9   | 83.5   | 163.1   | 236.2  | 2.0     | 2.8     |
| <i>Serpin7</i>         | Serpin          | 8071, 8076                                                                  | 379.2  | 7.4    | 773.3   | 8.7    | 2.0     | 1.2     |
| <i>Serpin11</i>        | Serpin          | 6359                                                                        | 0.0    | 4.9    | 36.2    | 32.1   | 3.1     | 6.5     |
| <i>Serpin12</i>        | Serpin          | 3776, 6215, 6531, 17814                                                     | 2417.1 | 19.6   | 5799.8  | 148.7  | 2.4     | 7.6     |
| <i>Serpin13</i>        | Serpin          | 2184                                                                        | 628.0  | 4.9    | 670.6   | 2.9    | 1.1     | 0.6     |
| <i>Serpin22</i>        | Serpin          | 3224                                                                        | 1161.2 | 0.0    | 2881.8  | 0.0    | 2.5     | 0/0     |
| <i>PI6</i>             |                 | 8286                                                                        | 0.0    | 0.0    | 839.8   | 67.1   | 70.9    | 27.3    |
| <i>PI-like</i>         |                 | 3674, 10722                                                                 | 118.5  | 7.4    | 646.4   | 70.0   | 5.5     | 9.5     |
| <i>Trypsin inh. B</i>  | Kunitz-BPTI     | 13936                                                                       | 0.0    | 0.0    | 151.0   | 0.0    | 12.8    | 0/0     |
| <i>Kazal-type PI</i>   | Kazal-1, -2     | 5197                                                                        | 0.0    | 0.0    | 120.8   | 2.9    | 10.2    | 1.2     |
| <i>Punch</i>           | GTP-cyclohydrol | 1029                                                                        | 237.0  | 0.0    | 350.4   | 23.3   | 1.5     | 9.5     |
| <i>Phe hydroxylase</i> | ACT             | 509                                                                         | 864.9  | 41.8   | 2036.0  | 20.4   | 2.4     | 0.5     |
| <i>Tyr hydroxylase</i> | Bioplerin-H     | 2023                                                                        | 11.8   | 0.0    | 199.4   | 20.4   | 16.8    | 8.3     |
| <i>DDC</i>             | DOPA-deC        | 940                                                                         | 0.0    | 0.0    | 1262.7  | 20.4   | 106.6   | 8.3     |
| <i>PAP1</i>            | CLIP, trypsin   | 3070                                                                        | 94.8   | 49.1   | 314.2   | 61.2   | 3.3     | 1.3     |
| <i>PAP2</i>            | CLIP, trypsin   | 1667                                                                        | 0.0    | 17.2   | 592.1   | 96.2   | 50.0    | 5.6     |
| <i>PAP3</i>            | CLIP, trypsin   | 1818                                                                        | 0.0    | 63.9   | 271.9   | 192.5  | 23.0    | 3.0     |
| <i>ProPO-p1</i>        |                 | 17085                                                                       | 616.1  | 5690.6 | 24.2    | 4858.3 | 0.0     | 0.9     |
| <i>ProPO-p2</i>        |                 | 17958                                                                       | 296.2  | 3249.3 | 18.1    | 2741.2 | 0.1     | 0.8     |
| <i>Zn proteinase</i>   | Peptidase-M14   | 915                                                                         | 0.0    | 51.6   | 126.9   | 75.8   | 10.7    | 1.5     |
| <i>Scolexin</i>        | Trypsin         | 10791, 10792, 16520,<br>18669, 18670, 18963                                 | 23.7   | 0.0    | 16650.2 | 5.8    | 702.6   | 2.4     |
| <i>Hdd1-like</i>       |                 | 2382                                                                        | 0.0    | 4.9    | 658.5   | 201.2  | 55.6    | 41.0    |
| <i>Hdd13-like</i>      |                 | 5606                                                                        | 11.8   | 0.0    | 114.8   | 11.7   | 9.7     | 4.8     |
| <i>Hdd23-like</i>      |                 | 6581                                                                        | 0.0    | 0.0    | 78.5    | 29.2   | 6.6     | 11.9    |

**Table S3.** Hemocyte adhesion-related genes (see footnote of Table S1)

| Gene name                                                  | Domain(s)                                         | Contig(s)                                     | nCF    | nCH     | nIF    | nIH     | nIF:nCF | nIH:nCH |
|------------------------------------------------------------|---------------------------------------------------|-----------------------------------------------|--------|---------|--------|---------|---------|---------|
| <u>HAIP</u>                                                | GH-18                                             | 2947                                          | 6137.5 | 51.6    | 5926.6 | 163.3   | 1.0     | 3.2     |
| <u>Hemolectin</u>                                          | C8, EGF, F5_F8-type-C, VWD,                       | 11280, 13813, 14711, 14760, 15506, 15594,     | 2772.5 | 34035.7 | 126.9  | 13458.1 | 0.1     | 0.4     |
| <i>Hemocyte-specific integrin <math>\alpha 1</math></i>    | FG-GAP, integrin- $\alpha$                        | 3997, 4957, 4966                              | 94.8   | 677.9   | 36.2   | 939.0   | 0.4     | 1.4     |
| <i>Hemocyte-specific integrin <math>\alpha 2</math></i>    | Integrin- $\alpha 2$                              | 5800, 5860, 8294, 9106                        | 142.2  | 0.0     | 175.2  | 8.7     | 1.2     | 3.6     |
| <i>Hemocyte-specific integrin <math>\alpha 3</math></i>    | Integrin- $\alpha$ , FG-GAP                       | 771                                           | 71.1   | 110.5   | 84.6   | 113.7   | 1.2     | 1.0     |
| <i>Plasmatocyte-specific integrin <math>\beta 1</math></i> | Integrin- $\beta$ , EGF-2                         | 1850, 13553, 18269                            | 118.5  | 975.0   | 84.6   | 1463.9  | 0.7     | 1.5     |
| <i>Integrin <math>\beta 1</math></i>                       | Integrin- $\beta$ , - $\beta$ tail, - $\beta$ cyt | 349                                           | 343.6  | 412.6   | 350.4  | 662.0   | 1.0     | 1.6     |
| <u>Integrin related-1</u>                                  | Integrin- $\beta$ -cyt                            | 461                                           | 11.8   | 117.9   | 84.6   | 314.9   | 7.1     | 2.7     |
| <i>Integrin-linked protein kinase 2</i>                    | ANK, PTK                                          | 2401                                          | 71.1   | 135.1   | 24.2   | 204.1   | 0.3     | 1.5     |
| <u>Lacunin</u>                                             | Ig, ADAM-spacer1, Kunitz-BPTI, PLAC               | 15, 2717, 15269, 15273                        | 1410.0 | 12488.9 | 120.8  | 12335.4 | 0.1     | 1.0     |
| <i>Laminin</i>                                             | Laminin-G2                                        | 4                                             | 639.8  | 4452.8  | 132.9  | 4578.4  | 0.2     | 1.0     |
| <i>Neuroglian</i>                                          | I-set, FN3                                        | 163                                           | 165.9  | 365.9   | 96.7   | 609.5   | 0.6     | 1.7     |
| <i>Tetraspanin</i>                                         |                                                   | 92, 3559, 4331, 4687, 5512, 6843, 7644, 17721 | 509.5  | 1761.0  | 930.4  | 2502.1  | 1.8     | 1.4     |
| <u>Reeler1/Hdd11</u>                                       | Reeler                                            | 3778                                          | 0.0    | 27.0    | 1160.0 | 81.7    | 97.9    | 3.0     |
| <i>Paralytic peptide BP1</i>                               | Lipoprotein_11                                    | 3375, 7873                                    | 296.2  | 852.2   | 447.1  | 974.0   | 1.5     | 1.1     |
| <i>Paralytic peptide BP2</i>                               | Lipoprotein_11                                    | 3648, 14107, 15055                            | 35.55  | 331.6   | 0.0    | 236.2   | 0.0     | 0.7     |
| <i>Paralytic peptide BP3</i>                               | Lipoprotein_11                                    | 4042, 5938, 15696, 16051, 16074, 16096,       | 2085.3 | 2512.5  | 2344.1 | 5922.7  | 1.1     | 2.4     |
| <u>uENF/PSP precursor</u>                                  | GBP-PSP                                           | 2651                                          | 284.4  | 0.0     | 749.1  | 0.0     | 2.6     | 0/0     |
| <u>Thrombospondin</u>                                      | EGF-CA, TSP-C & -3                                | 535                                           | 793.8  | 2.5     | 604.1  | 0.0     | 0.8     | 0.0     |

**Table S4.** Autophagy-related genes (see footnote of Table S1)

| Gene name        | Domain(s)                         | Contig(s)    | nCF   | nCH   | nIF   | nIH   | nIF:nCF | nIH:nCH |
|------------------|-----------------------------------|--------------|-------|-------|-------|-------|---------|---------|
| <i>Atg2</i>      | Chorein-N                         | 15384        | 71.1  | 0.0   | 30.2  | 0.0   | 0.4     | 0/0     |
| <i>Atg2 like</i> | Apt1                              | 8264         | 94.8  | 2.5   | 42.3  | 0.0   | 0.5     | 0.0     |
| <i>Atg3</i>      | Autophagy-N & -C,<br>BUD22, act-C | 392          | 414.7 | 144.9 | 145.0 | 140.0 | 0.4     | 1.0     |
| <i>Atg4</i>      | Peptidase-C54                     | 4329         | 213.3 | 2.5   | 60.4  | 5.8   | 0.3     | 2.4     |
| <i>Atg4-like</i> | Peptidase-C54                     | 11947        | 94.8  | 4.9   | 24.2  | 0.0   | 0.3     | 0.0     |
| <i>Atg5</i>      | APG5                              | 5386, 5513   | 343.6 | 7.4   | 78.5  | 17.5  | 0.2     | 2.4     |
| <i>Atg6</i>      | APG6                              | 12191, 14634 | 201.4 | 0.0   | 48.3  | 2.9   | 0.2     | 1.2     |
| <i>Atg8</i>      | Atg8                              | 7383         | 59.2  | 105.6 | 181.2 | 64.2  | 3.1     | 0.6     |
| <i>Atg12</i>     | APG12                             | 12607        | 106.6 | 2.5   | 12.1  | 2.9   | 0.1     | 1.2     |

**Table S5.** Genes of AMPs and other effector proteins (see footnote of Table S1)

| Gene name                                   | Domain(s)   | Contig(s)                                            | nCF    | nCH   | nIF     | nIH    | nIF:nCF | nIH:nCH |
|---------------------------------------------|-------------|------------------------------------------------------|--------|-------|---------|--------|---------|---------|
| <u><i>Attacin-1</i></u>                     | Attacin N&C | 8902, 14343                                          | 0.0    | 0.0   | 2114.5  | 61.2   | 178.5   | 24.9    |
| <u><i>Attacin-2</i></u>                     | Attacin N&C | 11040, 11711, 17135                                  | 0.0    | 49.1  | 1443.9  | 7940.7 | 121.9   | 161.7   |
| <u><i>Attacin-3</i></u>                     | Attacin N&C | 6782, 16576, 17705                                   | 0.0    | 0.0   | 833.7   | 102.1  | 70.4    | 41.6    |
| <u><i>Attacin-4</i></u>                     | Attacin N&C | 7203, 14641, 18324                                   | 23.7   | 7.4   | 2984.5  | 64.2   | 125.9   | 8.7     |
| <u><i>Attacin-5</i></u>                     | Attacin N&C | 13563, 17350                                         | 0.0    | 0.0   | 5207.7  | 0.0    | 439.5   | 0/0     |
| <u><i>Attacin-6</i></u>                     | Attacin C   | 15159, 15744                                         | 0.0    | 0.0   | 0.0     | 145.8  | 0/0     | 59.4    |
| <u><i>Cecropin-6</i></u>                    | Cecropin    | 14997                                                | 0.0    | 0.0   | 205.4   | 29.2   | 17.3    | 11.9    |
| <u><i>Cecropin B precursor</i></u>          |             | 13894                                                | 0.0    | 0.0   | 290.0   | 84.6   | 24.5    | 34.4    |
| <u><i>Cecropin-like peptide B-5</i></u>     |             | 12151, 15041                                         | 0.0    | 0.0   | 1141.8  | 0.0    | 96.4    | 0/0     |
| <u><i>Gallerimycin</i></u>                  |             | 10234                                                | 0.0    | 2.5   | 1504.3  | 20.4   | 127.0   | 8.3     |
| <u><i>Gloverin</i></u>                      |             | 2067                                                 | 11.8   | 0.0   | 1691.6  | 239.1  | 142.8   | 97.4    |
| <u><i>Putative PI</i></u>                   | TIL         | 16018                                                | 0.0    | 0.0   | 241.7   | 35.0   | 20.4    | 14.3    |
| <u><i>Immune related protein</i></u>        |             | 15998, 17184, 18819                                  | 0.0    | 39.3  | 821.6   | 2519.6 | 69.4    | 64.1    |
| <u><i>IMPI</i></u>                          |             | 3142                                                 | 11.8   | 17.2  | 2537.4  | 352.9  | 214.2   | 20.5    |
| <u><i>Lebocin-A precursor</i></u>           |             | 13916, 17301, 17434                                  | 35.5   | 0.0   | 8017.0  | 0.0    | 225.5   | 0/0     |
| <u><i>Lebocin-B precursor</i></u>           |             | 10853                                                | 0.0    | 0.0   | 682.7   | 2.9    | 57.6    | 1.2     |
| <u><i>Lebocin C precursor</i></u>           |             | 4903                                                 | 0.0    | 0.0   | 1685.6  | 17.5   | 142.3   | 7.1     |
| <u><i>Lebocin-D precursor</i></u>           |             | 7116                                                 | 11.8   | 9.8   | 5449.4  | 8.7    | 459.9   | 0.9     |
| <u><i>Lysozyme-like protein 1</i></u>       | LYZ1        | 1285                                                 | 284.4  | 113.0 | 428.9   | 140.0  | 1.5     | 1.2     |
| <u><i>Lysozyme</i></u>                      | LYZ         | 8421, 15931, 16133                                   | 1078.2 | 235.8 | 19640.7 | 2633.3 | 18.2    | 11.2    |
| <u><i>Moricin</i></u>                       |             | 9484                                                 | 11.8   | 0.0   | 809.6   | 163.3  | 68.3    | 66.5    |
| <u><i>Moricin-like</i></u>                  |             | 17439                                                | 0.0    | 0.0   | 592.1   | 90.4   | 50.0    | 36.8    |
| <u><i>Possible AMP</i></u>                  | Toxin_2     | 3746, 14568, 16292,<br>18150, 18699                  | 0.0    | 19.6  | 507.5   | 1816.8 | 42.8    | 92.5    |
| <u><i>Secreted peptide 30</i></u>           |             | 6597                                                 | 710.9  | 0.0   | 1208.3  | 0.0    | 1.7     | 0/0     |
| <u><i>Salivary Cys-rich peptide</i></u>     | WAP         | 4175                                                 | 0.0    | 17.2  | 241.7   | 131.2  | 20.4    | 7.6     |
| <u><i>Peptidase inhibitor precursor</i></u> | WAP         | 12848                                                | 0.00   | 39.3  | 0.0     | 2.9    | 0/0     | 0.1     |
| <u><i>Peptidase inhibitor-like</i></u>      | WAP         | 14536                                                | 71.09  | 0.0   | 48.3    | 0.0    | 0.7     | 0/0     |
| <u><i>Antileukoproteinase precursor</i></u> | WAP         | 15064                                                | 0.00   | 0.0   | 90.6    | 0.0    | 7.7     | 0/0     |
| <u><i>Putative WAP-2 isoform 1</i></u>      | WAP         | 13827                                                | 0.00   | 0.0   | 42.3    | 0.0    | 3.6     | 0/0     |
| <u><i>Transferrin</i></u>                   | Transferrin | 2145, 11027, 14937,<br>16606, 17206, 18239,<br>18308 | 1196.7 | 36.8  | 8542.6  | 277.0  | 7.1     | 7.5     |

**Table S6.** Other putative immunity-related genes (see footnote of Table S1)

| Gene name                     | Domain(s)                                       | Contig(s)             | nCF    | nCH    | nIF    | nIH   | nIF:nCF | nIH:nCH |
|-------------------------------|-------------------------------------------------|-----------------------|--------|--------|--------|-------|---------|---------|
| <i>FAK</i>                    | FERM-M, PK-Tyr,<br>Focal-AT                     | 82                    | 11.8   | 365.9  | 42.3   | 355.8 | 3.6     | 1.0     |
| <i>Alk</i>                    | SH3                                             | 8785                  | 0.0    | 12.3   | 0.0    | 0.0   | 0/0     | 0.2     |
| <i>Pvr</i>                    | Ig, PTK                                         | 222                   | 94.8   | 385.6  | 90.6   | 501.6 | 1.0     | 1.3     |
| <i>Serrate</i>                | EGF-Lam, LDLa                                   | 49                    | 7109.1 | 830.1  | 4428.4 | 793.2 | 0.6     | 1.0     |
| <i>Notch</i>                  | ANK, EGF-CA                                     | 6                     | 35.5   | 808.0  | 24.2   | 842.8 | 0.7     | 1.0     |
| <i>Dicer-2</i>                | ResIII, Helicase C,<br>dsRNA binding, PAZ       | 412, 824              | 71.1   | 275.1  | 90.6   | 402.4 | 1.3     | 1.5     |
| <i>Argonaute 1</i>            | PAZ-argonaute-like                              | 10180                 | 0.0    | 7.4    | 6.0    | 17.5  | 0.5     | 2.4     |
| <i>NOS</i>                    | NO synthase,<br>flavodoxinI                     | 6991, 11493,<br>11623 | 0.0    | 22.1   | 48.3   | 29.2  | 1.4     | 1.3     |
| <i>Peroxiredoxin</i>          | PRX-1cys                                        | 8403                  | 11.8   | 14.7   | 18.1   | 17.5  | 1.5     | 1.2     |
| <i>Thioredoxin POD1</i>       | PRX-Typ2cys                                     | 6299                  | 35.5   | 31.9   | 30.2   | 52.5  | 0.8     | 1.6     |
| <i>Thioredoxin POD2</i>       | PRX-Typ2cys                                     | 8926                  | 82.9   | 498.6  | 48.3   | 650.3 | 0.6     | 1.3     |
| <i>Thioredoxin POD3</i>       | PRX-Typ2cys                                     | 2937                  | 59.2   | 147.4  | 126.9  | 166.2 | 2.1     | 1.1     |
| <i>Brahma</i>                 | HSA, BRK,<br>SNF2-N, HELIC,<br>Bromodomain, TCH | 291                   | 142.2  | 218.6  | 102.7  | 189.6 | 0.7     | 0.9     |
| <i>Cationic peptide-8</i>     | amfpi-1                                         | 16281, 17312          | 4241.8 | 0.0    | 3268.4 | 0.0   | 0.8     | 0/0     |
| <i>DVA-AP3</i>                |                                                 | 7139                  | 248.8  | 1883.8 | 12.1   | 764.0 | 0.0     | 0.4     |
| <i>Aminoacylase</i>           | Peptidase-M20                                   | 3287                  | 82.9   | 1210.8 | 0.0    | 691.1 | 0.0     | 0.6     |
| <i>Hypoth. protein</i>        | Destabilase                                     | 6175                  | 130.3  | 0.0    | 314.2  | 2.9   | 2.4     | 1.2     |
| <i>GL21066</i>                |                                                 | 7671                  | 2689.6 | 7.4    | 2718.6 | 8.7   | 1.0     | 1.2     |
| <i>~GA16498-PA</i>            | Ig                                              | 5348                  | 592.4  | 0.0    | 404.8  | 0.0   | 0.7     | 0/0     |
| <i>Protein PTase-2c</i>       |                                                 | 11311                 | 0.0    | 2.5    | 18.1   | 26.2  | 1.5     | 10.7    |
| <i>Ral G-exch factor</i>      | RasGEF-N, RasGEF,                               | 671                   | 11.8   | 29.5   | 60.4   | 134.1 | 5.1     | 4.6     |
| <i>G-exch factor</i>          | RhoGEF, SH3                                     | 1970                  | 11.8   | 39.3   | 72.5   | 84.6  | 6.1     | 2.2     |
| <i>Arf6 G-exch factor</i>     |                                                 | 11356                 | 0.0    | 2.5    | 24.2   | 20.4  | 2.0     | 8.3     |
| <i>Vrille</i>                 | βZIP-2                                          | 1390                  | 11.8   | 76.1   | 84.6   | 55.4  | 7.1     | 0.7     |
| <i>Ankyrin repeat pr.</i>     |                                                 | 13966                 | 0.0    | 2.5    | 0.0    | 26.2  | 0/0     | 10.7    |
| <i>Ankyrin domain 54</i>      |                                                 | 6868                  | 0.0    | 2.5    | 6.0    | 32.1  | 0.5     | 13.1    |
| <i>Dipeptidyl peptidase 4</i> | DPPIV-N                                         | 6304                  | 11.8   | 0.0    | 66.5   | 2.9   | 5.6     | 1.2     |
| <i>TcasGA2-TC008649</i>       |                                                 | 537                   | 11.8   | 78.6   | 60.4   | 93.3  | 5.1     | 1.2     |

## Figure Legends

**Fig. 1. Distribution of 232 *M. sexta* immunity-related genes.** The pie chart shows gene number, contig number, and percentage of genes in each functional category relative to the entire set. The category of “intracellular signal transduction” is further divided into pathways (*right*).

**Fig. 2. Expression analysis of cellular components (CC, *top*), molecular functions (MF, *middle*), and biological processes (BP, *bottom*) at GO level 2.** The bar graph is generated using data from the sum of NRNs for each annotated gene. Each GO term is comprised of four
